# Supplementary material for: Monitoring and Genotyping of Wild Grapevine (Vitis vinifera L. subsp. sylvestris) in Slovenia
Source: MDPI journal article supplement (doi:10.3390/plants13091234), 2024-04-29
Supplement: s1 [file s1]

Figure S2: Best K for *sylvestris* populations

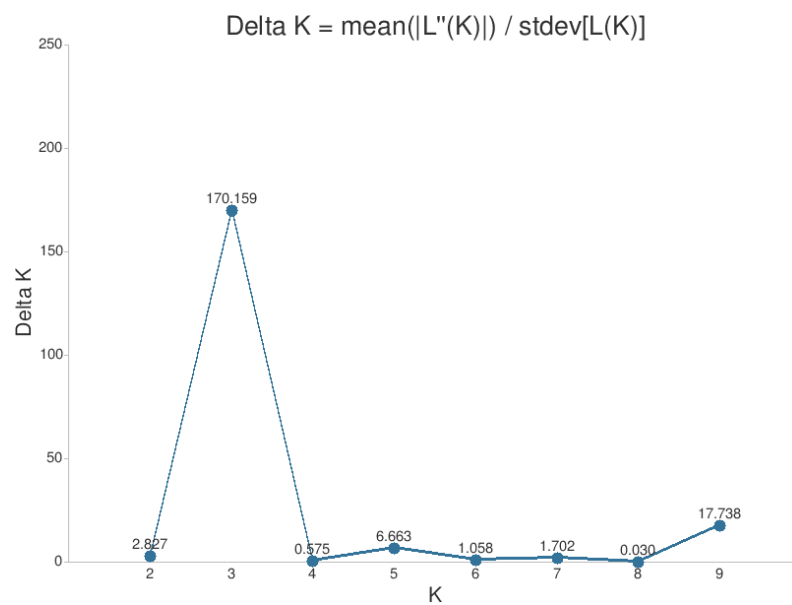

(a)

Results of STRUCTURE analyses. Calculating Best K by Evanno. Three different genetic groups (populations) were suggested ( $\Delta K = 3$ ). The test was run from K = 1 to 10 using STRUCTURE software.
