# Supplementary material for: Monitoring and Genotyping of Wild Grapevine (Vitis vinifera L. subsp. sylvestris) in Slovenia
Source: MDPI journal article supplement (doi:10.3390/plants13091234), 2024-04-29
Supplement: s1 [file s1]

Figure S1: Best K for Slovenian samples of *sylvestris*, cultivars, hybrids and rootstocks

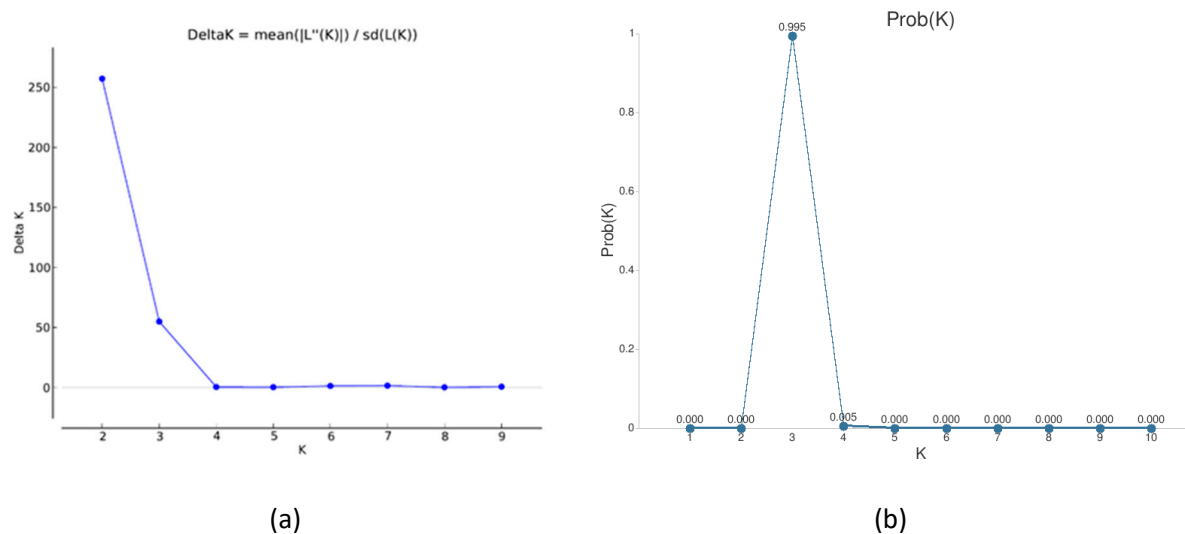

Results of STRUcTURE analyses. (a) Calculating Best K by Evanno. (b) Using median values of Ln Prob of Data to calculate Prob(K=k). Three different genetic groups (populations) were suggested ( $\Delta K = 3$ ). The test was run from K = 1 to 10 using STRUcTURE software.
