# Supplementary material for: Monitoring and Genotyping of Wild Grapevine (Vitis vinifera L. subsp. sylvestris) in Slovenia
Source: Plants (Basel). 2024 Apr 29;13(9):1234. doi: 10.3390/plants13091234 (PMC11085864; doi:10.3390/plants13091234)
Supplement: Supplementary file 1 [file plants-13-01234-s001.zip › Table_S1.xlsx]

## Sheet: DATA
Table SSR profiles of analyzed Slovenian sylvestris samples
Sample	Pop	Sampling Location	Country/region of origin	Species	VVS2		VVMD5		VVMD7		VVMD25		VVMD27		VVMD28		VVMD32		VRZAG62		VRZAG79		VVIN16		VVIN73		VVIP60		VVMD24		VVMD21		VVIB01		VVIH54		VVIQ52		VVIV37		VMC1B11		VVIP31
B1	Pop11	Brič	Slovenia	V. vinifera L. subsp. sylvestris (C. C.Gmelin) Hegi	151	151	230	230	261	261	255	257	190	190	236	236	240	272	194	194	251	251	149	149	266	266	306	314	208	210	251	251	289	289	157	163	76	78	150	160	169	185	179	181
B2	Pop11	Brič	Slovenia	V. vinifera L. subsp. sylvestris (C. C.Gmelin) Hegi	145	151	230	230	263	263	241	249	186	192	228	246	240	240	194	194	247	251	149	157	260	266	318	322	210	210	251	251	289	289	163	173	78	80	160	168	169	169	193	193
B3	Pop11	Brič	Slovenia	V. vinifera L. subsp. sylvestris (C. C.Gmelin) Hegi	151	155	230	234	257	263	249	255	190	192	228	234	240	272	194	193.89	247	251	157	157	266	266	322	322	210	214	251	251	289	295	163	163	76	88	150	160	169	169	177	193
B4	Pop11	Brič	Slovenia	V. vinifera L. subsp. sylvestris (C. C.Gmelin) Hegi	141	151	230	230	257	263	249	255	188	190	228	258	240	250	194	196	251	251	149	157	266	266	306	316	210	214	251	251	289	295	163	165	76	76	150	160	167	167	181	193
B5	Pop11	Brič	Slovenia	V. vinifera L. subsp. sylvestris (C. C.Gmelin) Hegi	151	155	230	240	261	263	255	255	190	192	236	236	240	256	194	194	251	255	149	149	266	266	306	316	210	210	250	252	291	291	165	165	76	76	150	150	167	169	181	193
B6	Pop11	Brič	Slovenia	V. vinifera L. subsp. sylvestris (C. C.Gmelin) Hegi	141	151	234	242	239	263	255	255	190	190	228	264	240	256	194	194	247	251	157	157	266	266	318	326	204	210	251	251	289	289	165	179	76	76	150	150	167	167	193	195
B7	Pop11	Brič	Slovenia	V. vinifera L. subsp. sylvestris (C. C.Gmelin) Hegi	133	141	230	234	249	261	239	255	180	190	236	236	237	240	196	204	251	259	145	157	266	266	318	326	210	212	250	250	289	289	165	165	76	82	150	150	167	167	175	181
KR1	Pop11	Krnice	Slovenia	V. vinifera L. subsp. sylvestris (C. C.Gmelin) Hegi	151	155	230	234	239	257	255	267	190	190	236	262	240	240	188	194	257	257	151	157	260	266	306	316	210	214	250	250	289	289	149	163	76	76	150	150	167	169	193	195
KR2	Pop11	Krnice	Slovenia	V. vinifera L. subsp. sylvestris (C. C.Gmelin) Hegi	151	157	230	234	263	263	249	249	190	190	236	236	240	256	194	194	251	255	149	151	260	266	306	316	210	214	250	250	289	291	163	163	72	78	150	150	167	167	191	193
KR3	Pop11	Krnice	Slovenia	V. vinifera L. subsp. sylvestris (C. C.Gmelin) Hegi	151	157	230	234	239	265	255	267	190	190	236	262	240	240	188	194	251	255	149	151	260	260	316	318	210	210	250	250	289	289	163	163	76	78	150	150	167	169	181	191
KR4	Pop11	Krnice	Slovenia	V. vinifera L. subsp. sylvestris (C. C.Gmelin) Hegi	133	151	230	234	239	263	267	267	190	190	236	236	240	240	186	192	251	255	149	157	260	266	306	314	214	214	250	250	289	289	163	163	76	76	150	162	167	169	193	195
KR5	Pop11	Krnice	Slovenia	V. vinifera L. subsp. sylvestris (C. C.Gmelin) Hegi	151	151	230	230	259	259	267	267	190	190	268	268	250	250	194	194	251	251	151	151	260	266	316	318	210	210	250	250	289	291	149	163	76	76	150	162	167	167	181	193
KR6	Pop11	Krnice	Slovenia	V. vinifera L. subsp. sylvestris (C. C.Gmelin) Hegi	151	155	230	230	239	261	255	267	190	190	268	268	240	250	194	194	251	251	149	151	260	266	306	316	212	214	250	250	289	289	163	165	76	76	150	154	167	167	193	193
KR7	Pop11	Krnice	Slovenia	V. vinifera L. subsp. sylvestris (C. C.Gmelin) Hegi	133	151	230	234	259	263	255	267	190	190	263	263	240	250	194	194	251	251	149	151	266	266	314	316	210	214	250	250	289	289	163	163	76	76	150	162	167	169	193	193
KR8	Pop11	Krnice	Slovenia	V. vinifera L. subsp. sylvestris (C. C.Gmelin) Hegi	133	155	234	234	249	259	249	267	190	190	236	262	240	256	192	192	251	251	149	157	260	266	314	316	210	212	250	250	289	291	163	163	76	78	150	150	167	167	181	193
KR9	Pop11	Krnice	Slovenia	V. vinifera L. subsp. sylvestris (C. C.Gmelin) Hegi	133	155	234	234	239	249	249	255	190	190	236	236	240	240	194	196	251	255	149	151	266	266	316	318	210	212	250	250	289	291	163	163	76	76	150	162	167	167	181	181
KR10	Pop11	Krnice	Slovenia	V. vinifera L. subsp. sylvestris (C. C.Gmelin) Hegi	133	133	230	230	249	263	249	249	190	192	236	264	240	250	194	196	251	251	151	157	266	266	306	316	204	212	250	250	289	289	149	163	78	80	154	162	167	169	181	193
KR11	Pop11	Krnice	Slovenia	V. vinifera L. subsp. sylvestris (C. C.Gmelin) Hegi	151	155	230	234	239	263	249	249	190	190	236	236	240	240	194	194	251	255	151	151	260	266	314	316	210	210	250	250	289	291	163	165	76	76	150	150	167	169	181	181
KR12	Pop11	Krnice	Slovenia	V. vinifera L. subsp. sylvestris (C. C.Gmelin) Hegi	155	155	230	234	261	261	255	255	190	190	236	236	240	240	194	194	251	255	149	157	260	266	306	316	210	214	250	250	289	289	163	165	76	76	150	162	167	169	181	193
KR13	Pop11	Krnice	Slovenia	V. vinifera L. subsp. sylvestris (C. C.Gmelin) Hegi	133	151	230	234	263	263	255	267	190	190	236	262	240	240	194	194	251	251	157	157	260	266	306	316	210	210	250	250	289	291	163	163	78	78	150	150	169	195	181	193
KR14	Pop11	Krnice	Slovenia	V. vinifera L. subsp. sylvestris (C. C.Gmelin) Hegi	133	135	228	236	239	249	249	255	182	190	228	246	240	256	194	196	243	247	149	149	266	266	316	318	206	210	244	250	291	295	149	165	76	82	150	168	171	185	181	187
KR15	Pop11	Krnice	Slovenia	V. vinifera L. subsp. sylvestris (C. C.Gmelin) Hegi	133	151	230	234	263	263	255	267	190	190	236	264	240	240	194	194	251	255	149	157	266	266	306	314	210	210	250	250	289	291	163	165	76	82	150	150	169	169	181	181
KR16	Pop11	Krnice	Slovenia	V. vinifera L. subsp. sylvestris (C. C.Gmelin) Hegi	133	151	230	230	237	257	255	267	190	192	236	236	240	256	194	194	255	255	149	157	260	266	306	318	204	210	250	250	289	291	163	165	76	80	160	160	167	171	187	193
KR17	Pop11	Krnice	Slovenia	V. vinifera L. subsp. sylvestris (C. C.Gmelin) Hegi	133	151	234	234	231	247	249	255	190	190	236	268	240	240	194	194	251	251	151	151	260	260	306	316	210	214	250	250	269	291	163	163	76	76	150	150	167	169	181	193
KR18	Pop11	Krnice	Slovenia	V. vinifera L. subsp. sylvestris (C. C.Gmelin) Hegi	151	151	230	230	257	259	267	267	190	190	236	264	240	240	194	196	251	255	149	149	260	266	306	316	210	210	250	250	289	291	163	165	76	76	150	150	169	169	181	195
KR19	Pop11	Krnice	Slovenia	V. vinifera L. subsp. sylvestris (C. C.Gmelin) Hegi	133	151	230	234	249	257	255	267	190	190	236	236	240	240	194	196	251	251	149	149	260	260	306	316	210	212	250	250	289	289	157	163	76	78	150	150	171	195	181	193
KR20	Pop11	Krnice	Slovenia	V. vinifera L. subsp. sylvestris (C. C.Gmelin) Hegi	155	155	228	234	239	263	249	255	190	192	250	264	240	256	194	204	251	255	149	149	266	266	306	314	206	210	250	250	291	291	159	165	76	76	160	160	167	169	181	193
KR21	Pop11	Krnice	Slovenia	V. vinifera L. subsp. sylvestris (C. C.Gmelin) Hegi	133	141	234	234	261	261	267	267	190	190	234	236	240	256	194	194	251	251	149	151	260	266	314	316	214	214	250	250	289	291	163	163	76	76	150	150	167	167	181	193
KR22	Pop11	Krnice	Slovenia	V. vinifera L. subsp. sylvestris (C. C.Gmelin) Hegi	151	151	230	234	263	263	249	267	190	190	236	264	240	256	194	194	251	255	149	157	260	266	306	316	210	214	250	250	289	291	157	163	76	76	150	150	167	167	179	193
KR23	Pop11	Krnice	Slovenia	V. vinifera L. subsp. sylvestris (C. C.Gmelin) Hegi	155	157	230	234	247	257	255	267	190	190	236	264	240	256	196	204	251	251	149	151	266	266	314	316	210	210	250	250	289	291	163	163	76	78	150	154	167	195	181	193
KR24	Pop11	Krnice	Slovenia	V. vinifera L. subsp. sylvestris (C. C.Gmelin) Hegi	133	151	234	234	259	263	249	249	190	190	234	236	240	250	196	198	251	255	149	149	260	266	314	316	210	210	244	250	289	291	163	163	76	76	150	162	169	169	181	193
KR25	Pop11	Krnice	Slovenia	V. vinifera L. subsp. sylvestris (C. C.Gmelin) Hegi	151	155	230	234	263	263	249	267	190	190	264	264	240	250	194	196	249	249	149	157	260	260	306	306	210	214	250	250	289	289	163	165	76	76	150	160	169	169	181	181
KR26	Pop11	Krnice	Slovenia	V. vinifera L. subsp. sylvestris (C. C.Gmelin) Hegi	133	133	234	234	261	261	249	267	190	190	234	236	240	250	194	194	251	255	149	157	260	266	306	316	210	212	250	250	289	291	163	163	76	76	150	162	167	169	191	193
KR27	Pop11	Krnice	Slovenia	V. vinifera L. subsp. sylvestris (C. C.Gmelin) Hegi	155	155	230	234	249	263	249	267	190	190	236	236	240	240	194	194	255	259	149	157	260	266	306	316	210	210	250	250	289	289	163	163	78	78	150	150	169	195	181	193
KR28	Pop11	Krnice	Slovenia	V. vinifera L. subsp. sylvestris (C. C.Gmelin) Hegi	133	155	234	234	237	249	249	255	190	190	236	236	240	240	194	196	251	255	149	151	266	266	316	318	210	212	250	250	289	291	163	163	76	76	150	162	167	167	181	181
KR29	Pop11	Krnice	Slovenia	V. vinifera L. subsp. sylvestris (C. C.Gmelin) Hegi	155	157	230	230	249	263	255	267	190	190	264	264	240	240	194	196	251	251	149	151	266	266	314	316	210	214	250	250	289	291	163	163	76	78	150	150	167	169	181	193
R1	Pop11	Rašica	Slovenia	V. vinifera L. subsp. sylvestris (C. C.Gmelin) Hegi	141	141	230	242	239	239	255	267	190	190	236	270	240	240	194	194	247	255	149	151	266	266	306	306	210	210	251	251	291	291	163	163	76	76	160	160	167	169	181	193
VK1	Pop11	Vinje_Katarija	Slovenia	V. vinifera L. subsp. sylvestris (C. C.Gmelin) Hegi	133	133	234	242	239	257	255	255	180	192	236	236	256	272	194	196	237	255	149	157	266	266	306	306	210	210	250	250	291	291	163	163	76	82	150	162	169	195	181	181
VK2	Pop11	Vinje_Katarija	Slovenia	V. vinifera L. subsp. sylvestris (C. C.Gmelin) Hegi	133	151	234	242	239	263	249	255	190	190	236	236	240	256	194	196	251	251	151	157	266	266	306	316	210	210	250	250	289	289	163	163	76	82	150	162	167	171	181	181
VK4	Pop11	Vinje_Katarija	Slovenia	V. vinifera L. subsp. sylvestris (C. C.Gmelin) Hegi	133	133	234	242	239	239	255	255	180	190	236	236	240	240	196	196	237	255	151	157	266	266	306	316	206	210	249	250	289	291	163	163	76	82	150	162	195	195	193	193
VK5	Pop11	Vinje_Katarija	Slovenia	V. vinifera L. subsp. sylvestris (C. C.Gmelin) Hegi	151	155	234	234	257	263	255	255	190	190	236	236	240	256	194	194	251	251	151	151	266	266	306	316	210	210	250	250	291	291	163	165	76	78	150	162	167	167	181	181
VK6	Pop11	Vinje_Katarija	Slovenia	V. vinifera L. subsp. sylvestris (C. C.Gmelin) Hegi	133	133	230	234	239	255	249	255	190	190	236	260	240	264	194	194	251	255	149	149	266	266	314	314	210	210	249	249	291	291	150	163	76	76	150	150	167	167	181	185
VK7	Pop11	Vinje_Katarija	Slovenia	V. vinifera L. subsp. sylvestris (C. C.Gmelin) Hegi	133	155	228	234	263	263	255	255	184	190	236	272	256	264	194	194	249	251	149	151	266	266	316	324	206	210	249	250	291	291	163	165	78	78	150	162	167	185	181	193
VK8	Pop11	Vinje_Katarija	Slovenia	V. vinifera L. subsp. sylvestris (C. C.Gmelin) Hegi	153	155	230	234	239	257	239	255	180	190	236	264	256	256	194	194	237	251	151	157	266	266	306	306	210	210	249	250	289	291	150	163	76	76	154	154	167	169	181	195
VK9	Pop11	Vinje_Katarija	Slovenia	V. vinifera L. subsp. sylvestris (C. C.Gmelin) Hegi	151	155	230	230	257	263	255	267	180	190	236	236	240	240	194	194	237	237	151	151	266	266	306	316	210	214	250	250	291	291	163	163	76	76	150	150	167	167	181	191
VK10	Pop11	Vinje_Katarija	Slovenia	V. vinifera L. subsp. sylvestris (C. C.Gmelin) Hegi	151	151	230	234	257	263	267	267	180	180	236	264	250	256	194	196	237	237	149	151	266	266	306	324	210	210	250	250	291	291	163	163	76	76	150	150	167	167	181	181
VK11	Pop11	Vinje_Katarija	Slovenia	V. vinifera L. subsp. sylvestris (C. C.Gmelin) Hegi	151	155	234	236	263	263	267	267	176	190	252	264	240	240	196	196	237	257	151	151	266	266	306	316	210	214	250	250	289	291	163	163	76	76	150	150	167	167	181	181
VK12	Pop11	Vinje_Katarija	Slovenia	V. vinifera L. subsp. sylvestris (C. C.Gmelin) Hegi	151	155	230	230	257	263	249	255	190	190	236	252	240	240	194	194	251	251	149	151	266	266	316	318	210	214	250	250	291	291	163	163	76	78	150	154	167	195	181	193
VK13	Pop11	Vinje_Katarija	Slovenia	V. vinifera L. subsp. sylvestris (C. C.Gmelin) Hegi	151	155	230	230	257	263	249	255	190	190	236	252	240	240	194	194	253	253	149	151	266	266	316	318	210	214	250	250	291	291	151	163	78	78	150	154	167	195	181	193
VK14	Pop11	Vinje_Katarija	Slovenia	V. vinifera L. subsp. sylvestris (C. C.Gmelin) Hegi	133	155	234	234	249	263	255	267	190	190	252	270	240	240	194	194	251	251	149	149	266	266	316	318	210	210	250	250	289	289	149	163	76	76	150	150	169	169	193	193
VK15	Pop11	Vinje_Katarija	Slovenia	V. vinifera L. subsp. sylvestris (C. C.Gmelin) Hegi	133	141	234	234	257	263	255	267	190	190	236	270	240	250	194	194	251	251	149	151	266	268	306	318	210	210	250	250	289	289	163	165	76	80	150	150	167	169	181	193
VK16	Pop11	Vinje_Katarija	Slovenia	V. vinifera L. subsp. sylvestris (C. C.Gmelin) Hegi	141	155	230	234	257	263	255	255	190	190	236	264	240	240	194	194	251	251	149	157	266	266	314	316	210	210	250	250	289	289	163	165	76	76	150	150	167	169	193	193
VK17	Pop11	Vinje_Katarija	Slovenia	V. vinifera L. subsp. sylvestris (C. C.Gmelin) Hegi	151	155	234	234	249	263	255	255	190	190	236	252	240	256	194	196	251	251	149	157	266	266	318	318	210	210	250	250	289	291	149	165	76	76	150	162	167	169	193	193
VK18	Pop11	Vinje_Katarija	Slovenia	V. vinifera L. subsp. sylvestris (C. C.Gmelin) Hegi	151	155	230	234	239	263	249	267	190	190	236	264	240	240	194	194	251	251	157	157	260	266	306	316	210	214	250	250	289	291	163	163	76	76	150	154	167	169	193	193
VK19	Pop11	Vinje_Katarija	Slovenia	V. vinifera L. subsp. sylvestris (C. C.Gmelin) Hegi	133	155	230	234	239	249	249	267	190	190	236	264	240	240	194	194	251	251	149	157	266	266	314	316	210	214	250	250	289	291	149	163	76	76	150	154	169	169	193	195
VK20	Pop11	Vinje_Katarija	Slovenia	V. vinifera L. subsp. sylvestris (C. C.Gmelin) Hegi	133	155	234	234	249	263	255	267	190	192	236	270	240	240	194	194	251	251	147	149	266	266	306	306	210	210	250	250	289	289	165	165	76	80	150	150	169	169	193	193
VK21	Pop11	Vinje_Katarija	Slovenia	V. vinifera L. subsp. sylvestris (C. C.Gmelin) Hegi	133	155	234	234	249	263	255	267	190	192	236	270	240	240	194	194	251	251	149	151	266	266	306	306	210	210	250	250	289	289	165	165	76	80	150	150	169	169	193	193
VK22	Pop11	Vinje_Katarija	Slovenia	V. vinifera L. subsp. sylvestris (C. C.Gmelin) Hegi	133	141	234	234	263	263	255	267	190	190	236	270	250	250	194	194	251	251	149	157	266	268	306	316	210	210	250	250	289	291	163	165	76	76	150	150	167	169	181	193
VK23	Pop11	Vinje_Katarija	Slovenia	V. vinifera L. subsp. sylvestris (C. C.Gmelin) Hegi	133	155	230	234	239	263	239	255	180	190	236	264	240	250	192	192	237	251	149	149	260	266	306	318	210	210	249	249	289	291	163	165	74	80	154	160	167	171	193	193
VK24	Pop11	Vinje_Katarija	Slovenia	V. vinifera L. subsp. sylvestris (C. C.Gmelin) Hegi	151	155	230	234	239	263	255	255	176	190	236	264	240	240	194	194	251	251	149	151	266	266	306	316	210	210	249	249	289	291	149	163	70	76	150	162	167	169	195	195
VK25	Pop11	Vinje_Katarija	Slovenia	V. vinifera L. subsp. sylvestris (C. C.Gmelin) Hegi	151	155	230	234	239	259	255	255	190	190	236	236	240	240	194	194	237	255	149	151	266	266	306	316	210	210	250	250	289	291	149	163	76	76	150	162	169	169	181	195
VK26	Pop11	Vinje_Katarija	Slovenia	V. vinifera L. subsp. sylvestris (C. C.Gmelin) Hegi	141	141	230	234	239	239	255	255	190	190	236	236	240	250	194	196	251	251	149	157	266	266	306	316	210	214	250	250	289	291	163	165	76	80	150	160	167	169	193	193
VK27	Pop11	Vinje_Katarija	Slovenia	V. vinifera L. subsp. sylvestris (C. C.Gmelin) Hegi	133	141	230	230	239	239	249	255	190	190	236	252	240	250	194	194	247	251	149	157	266	266	316	316	210	210	250	250	291	291	163	163	76	80	150	160	167	169	193	193
VK29	Pop11	Vinje_Katarija	Slovenia	V. vinifera L. subsp. sylvestris (C. C.Gmelin) Hegi	141	141	230	234	239	257	255	255	176	190	252	264	240	250	192	192	247	251	149	149	266	266	314	316	210	210	250	250	291	291	163	163	78	80	160	162	169	169	193	195
VK30	Pop11	Vinje_Katarija	Slovenia	V. vinifera L. subsp. sylvestris (C. C.Gmelin) Hegi	141	151	230	230	239	263	255	255	190	190	236	236	240	240	192	194	251	255	149	157	266	266	314	316	210	210	250	250	289	291	165	165	76	80	160	160	167	169	181	193
VK31	Pop11	Vinje_Katarija	Slovenia	V. vinifera L. subsp. sylvestris (C. C.Gmelin) Hegi	141	151	230	234	239	249	255	255	190	190	236	262	240	250	194	194	251	251	157	157	266	266	306	306	210	210	250	250	291	291	163	163	76	76	150	162	167	169	181	193
VK32	Pop11	Vinje_Katarija	Slovenia	V. vinifera L. subsp. sylvestris (C. C.Gmelin) Hegi	141	151	230	234	257	263	255	255	190	192	236	262	240	240	192	192	251	251	151	157	266	266	306	314	212	214	250	250	289	291	163	165	76	80	150	160	167	167	181	181
VK33	Pop11	Vinje_Katarija	Slovenia	V. vinifera L. subsp. sylvestris (C. C.Gmelin) Hegi	133	151	230	234	239	239	249	267	190	190	263	268	240	240	194	194	251	255	151	157	260	266	306	316	210	210	250	250	289	291	149	163	76	78	150	150	167	167	181	195
VK35	Pop11	Vinje_Katarija	Slovenia	V. vinifera L. subsp. sylvestris (C. C.Gmelin) Hegi	151	151	234	234	239	263	255	255	190	190	236	268	240	240	194	196	251	253	151	157	266	266	306	318	210	210	250	250	289	291	163	165	76	76	150	154	167	169	193	193
VK36	Pop11	vinje_Katarija	Slovenia	V. vinifera L. subsp. sylvestris (C. C.Gmelin) Hegi	141	151	234	234	239	263	255	267	190	190	236	262	240	256	192	194	251	251	149	151	266	266	314	318	210	210	250	250	289	291	163	165	76	76	154	160	167	169	181	193
VK37	Pop11	Vinje_Katarija	Slovenia	V. vinifera L. subsp. sylvestris (C. C.Gmelin) Hegi	133	151	230	234	257	263	255	255	190	190	236	270	256	256	194	194	251	255	151	157	260	266	306	316	210	214	250	250	289	291	163	163	76	78	150	150	169	169	181	181
VK38	Pop11	Vinje_Katarija	Slovenia	V. vinifera L. subsp. sylvestris (C. C.Gmelin) Hegi	133	151	234	236	239	263	239	255	180	190	248	262	240	272	194	204	237	255	149	151	260	266	314	318	206	210	244	249	291	291	163	177	82	82	150	160	167	171	181	195
VK39	Pop11	Vinje_Katarija	Slovenia	V. vinifera L. subsp. sylvestris (C. C.Gmelin) Hegi	143	151	234	234	239	257	255	255	190	190	252	262	240	240	194	194	251	251	151	157	266	266	306	316	210	214	250	250	289	291	163	163	76	76	154	160	167	169	181	193
VK40	Pop11	Vinje_Katarija	Slovenia	V. vinifera L. subsp. sylvestris (C. C.Gmelin) Hegi	133	151	230	234	239	263	239	255	190	190	236	236	240	272	194	194	251	251	151	151	260	266	316	316	210	210	250	250	291	291	163	163	76	78	154	160	167	169	193	193
VK42	Pop11	Vinje_Katarija	Slovenia	V. vinifera L. subsp. sylvestris (C. C.Gmelin) Hegi	143	151	230	242	249	263	255	267	190	190	236	262	240	256	194	196	251	251	149	157	266	266	316	316	210	214	250	250	289	291	149	167	76	76	154	160	167	169	181	181
VK43	Pop11	Vinje_Katarija	Slovenia	V. vinifera L. subsp. sylvestris (C. C.Gmelin) Hegi	133	151	234	234	257	263	255	267	190	190	236	236	240	240	194	194	233	251	149	157	266	266	306	318	210	210	250	250	289	291	157	163	76	76	150	150	167	169	181	193
VK44	Pop11	Vinje_Katarija	Slovenia	V. vinifera L. subsp. sylvestris (C. C.Gmelin) Hegi	133	151	230	234	239	239	249	267	190	190	264	264	240	240	196	196	251	255	151	157	260	266	306	316	210	210	249	249	289	291	157	163	76	78	150	150	167	167	181	195
VK45	Pop11	Vinje_Katarija	Slovenia	V. vinifera L. subsp. sylvestris (C. C.Gmelin) Hegi	141	151	230	234	239	263	249	255	190	190	236	236	240	250	194	194	251	255	157	157	260	266	306	316	210	210	250	250	291	291	163	163	76	76	150	162	167	169	181	193
VK46	Pop11	Vinje_Katarija	Slovenia	V. vinifera L. subsp. sylvestris (C. C.Gmelin) Hegi	151	151	230	234	239	249	255	267	190	190	228	264	240	256	196	204	251	251	149	149	266	266	316	322	210	210	250	250	289	291	163	179	76	78	154	168	169	171	181	193
VK47	Pop11	Vinje_Katarija	Slovenia	V. vinifera L. subsp. sylvestris (C. C.Gmelin) Hegi	141	151	230	230	257	263	255	267	190	190	236	264	240	240	194	224	251	251	149	151	266	266	314	316	210	210	250	250	289	289	165	167	76	76	150	154	167	167	181	193
VK48	Pop11	Vinje_Katarija	Slovenia	V. vinifera L. subsp. sylvestris (C. C.Gmelin) Hegi	133	133	234	242	239	249	255	255	190	192	236	236	250	256	194	196	251	251	149	151	266	266	316	316	210	210	250	250	291	295	149	165	78	82	160	162	167	185	195	195
VK49	Pop11	Vinje_Katarija	Slovenia	V. vinifera L. subsp. sylvestris (C. C.Gmelin) Hegi	133	133	242	242	239	263	255	255	190	192	236	246	240	256	194	196	251	251	149	149	266	266	316	322	210	210	249	249	291	295	149	165	76	82	150	160	167	185	193	195
VK50	Pop11	Vinje_Katarija	Slovenia	V. vinifera L. subsp. sylvestris (C. C.Gmelin) Hegi	151	155	234	234	249	263	255	255	190	190	236	236	256	256	194	194	251	251	149	151	266	266	316	316	210	210	250	250	291	291	163	165	76	78	162	162	167	167	181	193
VK51	Pop11	Vinje_Katarija	Slovenia	V. vinifera L. subsp. sylvestris (C. C.Gmelin) Hegi	151	151	230	234	249	263	255	267	184	190	236	264	264	264	194	194	249	255	149	151	266	266	314	316	210	210	249	249	291	291	149	163	76	78	150	150	169	185	181	185
VK52	Pop11	Vinje_Katarija	Slovenia	V. vinifera L. subsp. sylvestris (C. C.Gmelin) Hegi	133	151	230	230	239	263	255	255	190	190	246	260	240	240	194	194	251	251	149	151	266	266	306	314	210	210	249	257	289	291	149	167	76	76	150	160	171	185	185	193
VK53	Pop11	Vinje_Katarija	Slovenia	V. vinifera L. subsp. sylvestris (C. C.Gmelin) Hegi	141	151	230	234	239	239	255	267	190	190	236	264	240	240	194	194	251	251	149	151	266	266	316	316	210	214	249	249	289	291	149	165	76	78	150	150	167	169	193	193
VK54	Pop11	Vinje_Katarija	Slovenia	V. vinifera L. subsp. sylvestris (C. C.Gmelin) Hegi	141	151	230	234	239	239	255	267	190	190	236	264	240	240	194	194	251	251	149	151	266	266	316	316	210	214	250	249	289	291	149	165	76	78	150	150	167	169	193	193
VK55	Pop11	Vinje_Katarija	Slovenia	V. vinifera L. subsp. sylvestris (C. C.Gmelin) Hegi	151	155	230	234	239	263	249	255	190	190	236	264	240	256	194	194	251	251	149	151	266	266	316	316	210	214	251	251	289	291	165	165	76	76	150	154	167	169	181	193
Z1	Pop11	Žusem	Slovenia	V. vinifera L. subsp. sylvestris (C. C.Gmelin) Hegi	151	155	230	230	239	239	267	267	190	192	236	264	240	256	194	194	251	255	149	151	266	266	306	318	210	210	250	250	291	291	163	163	76	78	150	162	167	169	181	193
