# Supplementary material for: Monitoring and Genotyping of Wild Grapevine (Vitis vinifera L. subsp. sylvestris) in Slovenia
Source: Plants (Basel). 2024 Apr 29;13(9):1234. doi: 10.3390/plants13091234 (PMC11085864; doi:10.3390/plants13091234)
Supplement: Supplementary file 1 [file plants-13-01234-s001.zip › Table_S2.xlsx]

## Sheet: List1
List of Slovenian Sylvestris (sex)
Sample name	Sample Code/Variety name	Sampling Location	Country/region of origin	Species	APT3_1	APT3_2	GF02_31_1	GF02_31_2	VVIB23_1	VVIB23_2	Sex (M/F)
B1	097_BR1	Brič	Slovenia	V. vinifera L. subsp. sylvestris (C. C.Gmelin) Hegi	268	466	248	260	304	308	M
B2	098_BR2	Brič	Slovenia	V. vinifera L. subsp. sylvestris (C. C.Gmelin) Hegi	268	397	248	248	290	290	F
B3	099_BR3	Brič	Slovenia	V. vinifera L. subsp. sylvestris (C. C.Gmelin) Hegi	336	336	248	248	290	304	F
B4	100_BR4	Brič	Slovenia	V. vinifera L. subsp. sylvestris (C. C.Gmelin) Hegi	268	268	248	248	290	290	F
B5	101_BR5	Brič	Slovenia	V. vinifera L. subsp. sylvestris (C. C.Gmelin) Hegi	268	466	248	260	290	308	M
B6	104_P3	Brič	Slovenia	V. vinifera L. subsp. sylvestris (C. C.Gmelin) Hegi	268	397	248	248	290	290	F
B7	209_Sv_Peter	Brič	Slovenia	V. vinifera L. subsp. sylvestris (C. C.Gmelin) Hegi	268	466	248	260	290	308	M
KR1	208_Krnice1	Krnice	Slovenia	V. vinifera L. subsp. sylvestris (C. C.Gmelin) Hegi	268	466	248	260	290	308	M
KR2	209_Krnice2	Krnice	Slovenia	V. vinifera L. subsp. sylvestris (C. C.Gmelin) Hegi	268	397	248	248	290	290	F
KR3	210_Krnice4	Krnice	Slovenia	V. vinifera L. subsp. sylvestris (C. C.Gmelin) Hegi	268	466	248	260	290	308	M
KR4	211_Krnice5	Krnice	Slovenia	V. vinifera L. subsp. sylvestris (C. C.Gmelin) Hegi	268	397	248	248	290	290	F
KR5	212_Krnice6	Krnice	Slovenia	V. vinifera L. subsp. sylvestris (C. C.Gmelin) Hegi	268	466	248	260	290	308	M
KR6	213_Krnice7	Krnice	Slovenia	V. vinifera L. subsp. sylvestris (C. C.Gmelin) Hegi	268	397	248	248	290	290	F
KR7	214_Krnice10	Krnice	Slovenia	V. vinifera L. subsp. sylvestris (C. C.Gmelin) Hegi	268	466	248	260	290	308	M
KR8	215_Krnice12	Krnice	Slovenia	V. vinifera L. subsp. sylvestris (C. C.Gmelin) Hegi	268	466	248	260	290	308	M
KR9	216_Krnice15	Krnice	Slovenia	V. vinifera L. subsp. sylvestris (C. C.Gmelin) Hegi	268	466	248	260	290	308	M
KR10	217_Krnice17	Krnice	Slovenia	V. vinifera L. subsp. sylvestris (C. C.Gmelin) Hegi	268	466	248	260	290	308	M
KR11	218_Krnice20	Krnice	Slovenia	V. vinifera L. subsp. sylvestris (C. C.Gmelin) Hegi	268	397	248	248	290	290	F
KR12	219_Krnice21	Krnice	Slovenia	V. vinifera L. subsp. sylvestris (C. C.Gmelin) Hegi	268	466	248	260	290	308	M
KR13	227_HKovk1	Krnice	Slovenia	V. vinifera L. subsp. sylvestris (C. C.Gmelin) Hegi	268	397	248	248	290	290	F
KR14	228_HKovk2	Krnice	Slovenia	V. vinifera L. subsp. sylvestris (C. C.Gmelin) Hegi	268	397	248	248	290	304	F
KR15	212_Pekel1	Krnice	Slovenia	V. vinifera L. subsp. sylvestris (C. C.Gmelin) Hegi	268	466	248	260	290	308	M
KR16	213_Pekel2	Krnice	Slovenia	V. vinifera L. subsp. sylvestris (C. C.Gmelin) Hegi	268	466	248	260	290	308	M
KR17	214_Pekel3	Krnice	Slovenia	V. vinifera L. subsp. sylvestris (C. C.Gmelin) Hegi	268	466	248	260	290	308	M
KR18	215_Pekel4	Krnice	Slovenia	V. vinifera L. subsp. sylvestris (C. C.Gmelin) Hegi	268	466	248	260	290	308	M
KR19	216_Pekel5	Krnice	Slovenia	V. vinifera L. subsp. sylvestris (C. C.Gmelin) Hegi	268	268	248	248	290	290	F
KR20	217_Pekel6	Krnice	Slovenia	V. vinifera L. subsp. sylvestris (C. C.Gmelin) Hegi	268	397	248	248	290	304	F
KR21	218_Pekel7	Krnice	Slovenia	V. vinifera L. subsp. sylvestris (C. C.Gmelin) Hegi	268	466	248	260	290	308	M
KR22	219_60_1	Krnice	Slovenia	V. vinifera L. subsp. sylvestris (C. C.Gmelin) Hegi	268	466	248	260	290	308	M
KR23	220_Po_st_61	Krnice	Slovenia	V. vinifera L. subsp. sylvestris (C. C.Gmelin) Hegi	268	466	248	260	290	308	M
KR24	221_po61_po_cesti	Krnice	Slovenia	V. vinifera L. subsp. sylvestris (C. C.Gmelin) Hegi	268	268	248	248	290	290	F
KR25	222_od61_kocgozda	Krnice	Slovenia	V. vinifera L. subsp. sylvestris (C. C.Gmelin) Hegi	268	268	248	248	290	290	F
KR26	223_S5	Krnice	Slovenia	V. vinifera L. subsp. sylvestris (C. C.Gmelin) Hegi	268	268	248	248	290	290	F
KR27	224_15m_nadS5	Krnice	Slovenia	V. vinifera L. subsp. sylvestris (C. C.Gmelin) Hegi	268	466	248	260	290	308	M
KR28	225_S6	Krnice	Slovenia	V. vinifera L. subsp. sylvestris (C. C.Gmelin) Hegi	268	466	248	260	290	308	M
KR29	226_7	Krnice	Slovenia	V. vinifera L. subsp. sylvestris (C. C.Gmelin) Hegi	268	268	248	248	290	290	F
R1	096_GAM	Rašica	Slovenia	V. vinifera L. subsp. sylvestris (C. C.Gmelin) Hegi	268	466	248	260	290	308	M
VK1	30	Vinje_Katarija	Slovenia	V. vinifera L. subsp. sylvestris (C. C.Gmelin) Hegi	268	268	248	248	290	290	F
VK2	37	Vinje_Katarija	Slovenia	V. vinifera L. subsp. sylvestris (C. C.Gmelin) Hegi	268	268	248	248	290	290	F
VK4	34	Vinje_Katarija	Slovenia	V. vinifera L. subsp. sylvestris (C. C.Gmelin) Hegi	268	466	248	260	290	308	M
VK5	17	Vinje_Katarija	Slovenia	V. vinifera L. subsp. sylvestris (C. C.Gmelin) Hegi	268	466	248	260	290	308	M
VK6	14	Vinje_Katarija	Slovenia	V. vinifera L. subsp. sylvestris (C. C.Gmelin) Hegi	268	466	248	260	290	308	M
VK7	12	Vinje_Katarija	Slovenia	V. vinifera L. subsp. sylvestris (C. C.Gmelin) Hegi	268	466	248	260	290	308	M
VK8	1	Vinje_Katarija	Slovenia	V. vinifera L. subsp. sylvestris (C. C.Gmelin) Hegi	268	466	248	260	290	308	M
VK9	186_Vvas4	Vinje_Katarija	Slovenia	V. vinifera L. subsp. sylvestris (C. C.Gmelin) Hegi	268	466	248	260	290	308	M
VK10	187_Vvas3	Vinje_Katarija	Slovenia	V. vinifera L. subsp. sylvestris (C. C.Gmelin) Hegi	268	466	248	260	290	308	M
VK11	188_Vvas1	Vinje_Katarija	Slovenia	V. vinifera L. subsp. sylvestris (C. C.Gmelin) Hegi	268	466	248	260	290	308	M
VK12	189_ZKresnicah1	Vinje_Katarija	Slovenia	V. vinifera L. subsp. sylvestris (C. C.Gmelin) Hegi	268	466	248	260	290	308	M
VK13	190_ZKresnicah2	Vinje_Katarija	Slovenia	V. vinifera L. subsp. sylvestris (C. C.Gmelin) Hegi	268	466	248	260	290	308	M
VK14	191_Katarija1	Vinje_Katarija	Slovenia	V. vinifera L. subsp. sylvestris (C. C.Gmelin) Hegi	268	397	248	248	290	290	F
VK15	192_Katarija2	Vinje_Katarija	Slovenia	V. vinifera L. subsp. sylvestris (C. C.Gmelin) Hegi	268	466	248	260	290	308	M
VK16	193_Katarija3	Vinje_Katarija	Slovenia	V. vinifera L. subsp. sylvestris (C. C.Gmelin) Hegi	268	397	248	248	290	290	F
VK17	194_Katarija4	Vinje_Katarija	Slovenia	V. vinifera L. subsp. sylvestris (C. C.Gmelin) Hegi	268	397	248	248	290	290	F
VK18	195_Katarija5	Vinje_Katarija	Slovenia	V. vinifera L. subsp. sylvestris (C. C.Gmelin) Hegi	268	397	248	248	290	290	F
VK19	196_Katarija6	Vinje_Katarija	Slovenia	V. vinifera L. subsp. sylvestris (C. C.Gmelin) Hegi	268	397	248	248	290	290	F
VK20	197_Katarija8	Vinje_Katarija	Slovenia	V. vinifera L. subsp. sylvestris (C. C.Gmelin) Hegi	268	397	248	248	290	290	F
VK21	198_Katarija10	Vinje_Katarija	Slovenia	V. vinifera L. subsp. sylvestris (C. C.Gmelin) Hegi	268	397	248	248	290	290	F
VK22	199_Katarija11	Vinje_Katarija	Slovenia	V. vinifera L. subsp. sylvestris (C. C.Gmelin) Hegi	268	397	248	248	290	290	F
VK23	200_Katarija12	Vinje_Katarija	Slovenia	V. vinifera L. subsp. sylvestris (C. C.Gmelin) Hegi	268	466	248	260	290	308	M
VK24	201_Katarija13	Vinje_Katarija	Slovenia	V. vinifera L. subsp. sylvestris (C. C.Gmelin) Hegi	268	466	248	260	290	308	M
VK25	202_Katarija14	Vinje_Katarija	Slovenia	V. vinifera L. subsp. sylvestris (C. C.Gmelin) Hegi	268	397	248	248	290	290	F
VK26	203_Katarija15	Vinje_Katarija	Slovenia	V. vinifera L. subsp. sylvestris (C. C.Gmelin) Hegi	268	397	248	248	290	290	F
VK27	204_Katarija16	Vinje_Katarija	Slovenia	V. vinifera L. subsp. sylvestris (C. C.Gmelin) Hegi	268	397	248	248	290	290	F
VK29	206_Katarija18	Vinje_Katarija	Slovenia	V. vinifera L. subsp. sylvestris (C. C.Gmelin) Hegi	268	397	248	248	290	290	F
VK30	207_Katarija19	Vinje_Katarija	Slovenia	V. vinifera L. subsp. sylvestris (C. C.Gmelin) Hegi	268	397	248	248	290	290	F
VK31	220_SP3_1	Vinje_Katarija	Slovenia	V. vinifera L. subsp. sylvestris (C. C.Gmelin) Hegi	268	466	248	260	290	308	M
VK32	222_SP3_4	Vinje_Katarija	Slovenia	V. vinifera L. subsp. sylvestris (C. C.Gmelin) Hegi	268	397	248	248	290	290	F
VK33	223_SP3_5	Vinje_Katarija	Slovenia	V. vinifera L. subsp. sylvestris (C. C.Gmelin) Hegi	268	466	248	260	290	308	M
VK35	225_Jesenje1	Vinje_Katarija	Slovenia	V. vinifera L. subsp. sylvestris (C. C.Gmelin) Hegi	268	466	248	260	290	308	M
VK36	226_Jesenje2	vinje_Katarija	Slovenia	V. vinifera L. subsp. sylvestris (C. C.Gmelin) Hegi	268	397	248	248	290	290	F
VK37	229_44	Vinje_Katarija	Slovenia	V. vinifera L. subsp. sylvestris (C. C.Gmelin) Hegi	268	466	248	260	290	308	M
VK38	230_23	Vinje_Katarija	Slovenia	V. vinifera L. subsp. sylvestris (C. C.Gmelin) Hegi	268	466	248	260	288	290	M
VK39	231_Vinje43	Vinje_Katarija	Slovenia	V. vinifera L. subsp. sylvestris (C. C.Gmelin) Hegi	268	397	248	248	290	290	F
VK40	232_3	Vinje_Katarija	Slovenia	V. vinifera L. subsp. sylvestris (C. C.Gmelin) Hegi	268	397	248	248	290	290	F
VK42	234_9	Vinje_Katarija	Slovenia	V. vinifera L. subsp. sylvestris (C. C.Gmelin) Hegi	268	397	248	248	290	290	F
VK43	210_Katarija1_7	Vinje_Katarija	Slovenia	V. vinifera L. subsp. sylvestris (C. C.Gmelin) Hegi	268	268	248	248	290	290	F
VK44	211_SP_Prekar3_6	Vinje_Katarija	Slovenia	V. vinifera L. subsp. sylvestris (C. C.Gmelin) Hegi	268	466	248	260	290	308	M
VK45	221_SP3_2	Vinje_Katarija	Slovenia	V. vinifera L. subsp. sylvestris (C. C.Gmelin) Hegi	268	466	248	260	290	308	M
VK46	36_Vinje2	Vinje_Katarija	Slovenia	V. vinifera L. subsp. sylvestris (C. C.Gmelin) Hegi	268	466	248	260	290	308	M
VK47	37_Klopce9	Vinje_Katarija	Slovenia	V. vinifera L. subsp. sylvestris (C. C.Gmelin) Hegi	268	466	248	260	290	308	M
VK48	38_Klopce1	Vinje_Katarija	Slovenia	V. vinifera L. subsp. sylvestris (C. C.Gmelin) Hegi	268	466	248	260	288	290	M
VK49	39_Klopce2	Vinje_Katarija	Slovenia	V. vinifera L. subsp. sylvestris (C. C.Gmelin) Hegi	268	466	248	260	288	290	M
VK50	40_Klopce5	Vinje_Katarija	Slovenia	V. vinifera L. subsp. sylvestris (C. C.Gmelin) Hegi	268	268	248	248	290	290	F
VK51	41_Klopce6	Vinje_Katarija	Slovenia	V. vinifera L. subsp. sylvestris (C. C.Gmelin) Hegi	268	268	248	248	304	304	F
VK52	42_Klopce8	Vinje_Katarija	Slovenia	V. vinifera L. subsp. sylvestris (C. C.Gmelin) Hegi	268	466	248	260	290	308	M
VK53	43_Klopce10	Vinje_Katarija	Slovenia	V. vinifera L. subsp. sylvestris (C. C.Gmelin) Hegi	268	466	248	260	290	308	M
VK54	44_Klopce11	Vinje_Katarija	Slovenia	V. vinifera L. subsp. sylvestris (C. C.Gmelin) Hegi	268	466	248	260	290	308	M
VK55	45_Tomazin	Vinje_Katarija	Slovenia	V. vinifera L. subsp. sylvestris (C. C.Gmelin) Hegi	268	466	248	260	290	308	M
Z1	183_Zusem	Žusem	Slovenia	V. vinifera L. subsp. sylvestris (C. C.Gmelin) Hegi	268	466	248	260	290	308	M
