# Supplementary material for: Monitoring and Genotyping of Wild Grapevine (Vitis vinifera L. subsp. sylvestris) in Slovenia
Source: Plants (Basel). 2024 Apr 29;13(9):1234. doi: 10.3390/plants13091234 (PMC11085864; doi:10.3390/plants13091234)
Supplement: Supplementary file 1 [file plants-13-01234-s001.zip › Table_S3.xlsx]

## Sheet: List1 
List of Slovenian samples, sylvestris, cultivars, hybrids, rootstocks
Sample	Sample name	Sampling Location	Prime name	Country/region of origin	VVIC number	Species
S1	B1	Brič		Slovenia	-	V. vinifera L. subsp. sylvestris (C. C.Gmelin) Hegi
S2	B2	Brič		Slovenia	-	V. vinifera L. subsp. sylvestris (C. C.Gmelin) Hegi
S3	B3	Brič		Slovenia	-	V. vinifera L. subsp. sylvestris (C. C.Gmelin) Hegi
S4	B4	Brič		Slovenia	-	V. vinifera L. subsp. sylvestris (C. C.Gmelin) Hegi
S5	B5	Brič		Slovenia	-	V. vinifera L. subsp. sylvestris (C. C.Gmelin) Hegi
S6	B6	Brič		Slovenia	-	V. vinifera L. subsp. sylvestris (C. C.Gmelin) Hegi
S7	B7	Brič		Slovenia	-	V. vinifera L. subsp. sylvestris (C. C.Gmelin) Hegi
S8	KR1	Krnice		Slovenia	-	V. vinifera L. subsp. sylvestris (C. C.Gmelin) Hegi
S9	KR2	Krnice		Slovenia	-	V. vinifera L. subsp. sylvestris (C. C.Gmelin) Hegi
S10	KR3	Krnice		Slovenia	-	V. vinifera L. subsp. sylvestris (C. C.Gmelin) Hegi
S11	KR4	Krnice		Slovenia	-	V. vinifera L. subsp. sylvestris (C. C.Gmelin) Hegi
S12	KR5	Krnice		Slovenia	-	V. vinifera L. subsp. sylvestris (C. C.Gmelin) Hegi
S13	KR6	Krnice		Slovenia	-	V. vinifera L. subsp. sylvestris (C. C.Gmelin) Hegi
S14	KR7	Krnice		Slovenia	-	V. vinifera L. subsp. sylvestris (C. C.Gmelin) Hegi
S15	KR8	Krnice		Slovenia	-	V. vinifera L. subsp. sylvestris (C. C.Gmelin) Hegi
S16	KR9	Krnice		Slovenia	-	V. vinifera L. subsp. sylvestris (C. C.Gmelin) Hegi
S17	KR10	Krnice		Slovenia	-	V. vinifera L. subsp. sylvestris (C. C.Gmelin) Hegi
S18	KR11	Krnice		Slovenia	-	V. vinifera L. subsp. sylvestris (C. C.Gmelin) Hegi
S19	KR12	Krnice		Slovenia	-	V. vinifera L. subsp. sylvestris (C. C.Gmelin) Hegi
S20	KR13	Krnice		Slovenia	-	V. vinifera L. subsp. sylvestris (C. C.Gmelin) Hegi
S21	KR14	Krnice		Slovenia	-	V. vinifera L. subsp. sylvestris (C. C.Gmelin) Hegi
S22	KR15	Krnice		Slovenia	-	V. vinifera L. subsp. sylvestris (C. C.Gmelin) Hegi
S23	KR16	Krnice		Slovenia	-	V. vinifera L. subsp. sylvestris (C. C.Gmelin) Hegi
S24	KR17	Krnice		Slovenia	-	V. vinifera L. subsp. sylvestris (C. C.Gmelin) Hegi
S25	KR18	Krnice		Slovenia	-	V. vinifera L. subsp. sylvestris (C. C.Gmelin) Hegi
S26	KR19	Krnice		Slovenia	-	V. vinifera L. subsp. sylvestris (C. C.Gmelin) Hegi
S27	KR20	Krnice		Slovenia	-	V. vinifera L. subsp. sylvestris (C. C.Gmelin) Hegi
S28	KR21	Krnice		Slovenia	-	V. vinifera L. subsp. sylvestris (C. C.Gmelin) Hegi
S29	KR22	Krnice		Slovenia	-	V. vinifera L. subsp. sylvestris (C. C.Gmelin) Hegi
S30	KR23	Krnice		Slovenia	-	V. vinifera L. subsp. sylvestris (C. C.Gmelin) Hegi
S31	KR24	Krnice		Slovenia	-	V. vinifera L. subsp. sylvestris (C. C.Gmelin) Hegi
S32	KR25	Krnice		Slovenia	-	V. vinifera L. subsp. sylvestris (C. C.Gmelin) Hegi
S33	KR26	Krnice		Slovenia	-	V. vinifera L. subsp. sylvestris (C. C.Gmelin) Hegi
S34	KR27	Krnice		Slovenia	-	V. vinifera L. subsp. sylvestris (C. C.Gmelin) Hegi
S35	KR28	Krnice		Slovenia	-	V. vinifera L. subsp. sylvestris (C. C.Gmelin) Hegi
S36	KR29	Krnice		Slovenia	-	V. vinifera L. subsp. sylvestris (C. C.Gmelin) Hegi
S37	R1	Rašica		Slovenia	-	V. vinifera L. subsp. sylvestris (C. C.Gmelin) Hegi
S38	VK1	Vinje_Katarija		Slovenia	-	V. vinifera L. subsp. sylvestris (C. C.Gmelin) Hegi
S39	VK2	Vinje_Katarija		Slovenia	-	V. vinifera L. subsp. sylvestris (C. C.Gmelin) Hegi
S40	VK4	Vinje_Katarija		Slovenia	-	V. vinifera L. subsp. sylvestris (C. C.Gmelin) Hegi
S41	VK5	Vinje_Katarija		Slovenia	-	V. vinifera L. subsp. sylvestris (C. C.Gmelin) Hegi
S42	VK6	Vinje_Katarija		Slovenia	-	V. vinifera L. subsp. sylvestris (C. C.Gmelin) Hegi
S43	VK7	Vinje_Katarija		Slovenia	-	V. vinifera L. subsp. sylvestris (C. C.Gmelin) Hegi
S44	VK8	Vinje_Katarija		Slovenia	-	V. vinifera L. subsp. sylvestris (C. C.Gmelin) Hegi
S45	VK9	Vinje_Katarija		Slovenia	-	V. vinifera L. subsp. sylvestris (C. C.Gmelin) Hegi
S46	VK10	Vinje_Katarija		Slovenia	-	V. vinifera L. subsp. sylvestris (C. C.Gmelin) Hegi
S47	VK11	Vinje_Katarija		Slovenia	-	V. vinifera L. subsp. sylvestris (C. C.Gmelin) Hegi
S48	VK12	Vinje_Katarija		Slovenia	-	V. vinifera L. subsp. sylvestris (C. C.Gmelin) Hegi
S49	VK13	Vinje_Katarija		Slovenia	-	V. vinifera L. subsp. sylvestris (C. C.Gmelin) Hegi
S50	VK14	Vinje_Katarija		Slovenia	-	V. vinifera L. subsp. sylvestris (C. C.Gmelin) Hegi
S51	VK15	Vinje_Katarija		Slovenia	-	V. vinifera L. subsp. sylvestris (C. C.Gmelin) Hegi
S52	VK16	Vinje_Katarija		Slovenia	-	V. vinifera L. subsp. sylvestris (C. C.Gmelin) Hegi
S53	VK17	Vinje_Katarija		Slovenia	-	V. vinifera L. subsp. sylvestris (C. C.Gmelin) Hegi
S54	VK18	Vinje_Katarija		Slovenia	-	V. vinifera L. subsp. sylvestris (C. C.Gmelin) Hegi
S55	VK19	Vinje_Katarija		Slovenia	-	V. vinifera L. subsp. sylvestris (C. C.Gmelin) Hegi
S56	VK20	Vinje_Katarija		Slovenia	-	V. vinifera L. subsp. sylvestris (C. C.Gmelin) Hegi
S57	VK21	Vinje_Katarija		Slovenia	-	V. vinifera L. subsp. sylvestris (C. C.Gmelin) Hegi
S58	VK22	Vinje_Katarija		Slovenia	-	V. vinifera L. subsp. sylvestris (C. C.Gmelin) Hegi
S59	VK23	Vinje_Katarija		Slovenia	-	V. vinifera L. subsp. sylvestris (C. C.Gmelin) Hegi
S60	VK24	Vinje_Katarija		Slovenia	-	V. vinifera L. subsp. sylvestris (C. C.Gmelin) Hegi
S61	VK25	Vinje_Katarija		Slovenia	-	V. vinifera L. subsp. sylvestris (C. C.Gmelin) Hegi
S62	VK26	Vinje_Katarija		Slovenia	-	V. vinifera L. subsp. sylvestris (C. C.Gmelin) Hegi
S63	VK27	Vinje_Katarija		Slovenia	-	V. vinifera L. subsp. sylvestris (C. C.Gmelin) Hegi
S64	VK29	Vinje_Katarija		Slovenia	-	V. vinifera L. subsp. sylvestris (C. C.Gmelin) Hegi
S65	VK30	Vinje_Katarija		Slovenia	-	V. vinifera L. subsp. sylvestris (C. C.Gmelin) Hegi
S66	VK31	Vinje_Katarija		Slovenia	-	V. vinifera L. subsp. sylvestris (C. C.Gmelin) Hegi
S67	VK32	Vinje_Katarija		Slovenia	-	V. vinifera L. subsp. sylvestris (C. C.Gmelin) Hegi
S68	VK33	Vinje_Katarija		Slovenia	-	V. vinifera L. subsp. sylvestris (C. C.Gmelin) Hegi
S69	VK35	Vinje_Katarija		Slovenia	-	V. vinifera L. subsp. sylvestris (C. C.Gmelin) Hegi
S70	VK36	vinje_Katarija		Slovenia	-	V. vinifera L. subsp. sylvestris (C. C.Gmelin) Hegi
S71	VK37	Vinje_Katarija		Slovenia	-	V. vinifera L. subsp. sylvestris (C. C.Gmelin) Hegi
S72	VK38	Vinje_Katarija		Slovenia	-	V. vinifera L. subsp. sylvestris (C. C.Gmelin) Hegi
S73	VK39	Vinje_Katarija		Slovenia	-	V. vinifera L. subsp. sylvestris (C. C.Gmelin) Hegi
S74	VK40	Vinje_Katarija		Slovenia	-	V. vinifera L. subsp. sylvestris (C. C.Gmelin) Hegi
S75	VK42	Vinje_Katarija		Slovenia	-	V. vinifera L. subsp. sylvestris (C. C.Gmelin) Hegi
S76	VK43	Vinje_Katarija		Slovenia	-	V. vinifera L. subsp. sylvestris (C. C.Gmelin) Hegi
S77	VK44	Vinje_Katarija		Slovenia	-	V. vinifera L. subsp. sylvestris (C. C.Gmelin) Hegi
S78	VK45	Vinje_Katarija		Slovenia	-	V. vinifera L. subsp. sylvestris (C. C.Gmelin) Hegi
S79	VK46	Vinje_Katarija		Slovenia	-	V. vinifera L. subsp. sylvestris (C. C.Gmelin) Hegi
S80	VK47	Vinje_Katarija		Slovenia	-	V. vinifera L. subsp. sylvestris (C. C.Gmelin) Hegi
S81	VK48	Vinje_Katarija		Slovenia	-	V. vinifera L. subsp. sylvestris (C. C.Gmelin) Hegi
S82	VK49	Vinje_Katarija		Slovenia	-	V. vinifera L. subsp. sylvestris (C. C.Gmelin) Hegi
S83	VK50	Vinje_Katarija		Slovenia	-	V. vinifera L. subsp. sylvestris (C. C.Gmelin) Hegi
S84	VK51	Vinje_Katarija		Slovenia	-	V. vinifera L. subsp. sylvestris (C. C.Gmelin) Hegi
S85	VK52	Vinje_Katarija		Slovenia	-	V. vinifera L. subsp. sylvestris (C. C.Gmelin) Hegi
S86	VK53	Vinje_Katarija		Slovenia	-	V. vinifera L. subsp. sylvestris (C. C.Gmelin) Hegi
S87	VK54	Vinje_Katarija		Slovenia	-	V. vinifera L. subsp. sylvestris (C. C.Gmelin) Hegi
S88	VK55	Vinje_Katarija		Slovenia	-	V. vinifera L. subsp. sylvestris (C. C.Gmelin) Hegi
S89	Z1	Žusem		Slovenia	-	V. vinifera L. subsp. sylvestris (C. C.Gmelin) Hegi
C1	BLAUFRAENKISCH		BLAUFRAENKISCH		1459	V. vinifera L. subsp. sativa (DC.) Hegi
C2	CHAOUCH_BLANC		CHAOUCH BLANC		10196	V. vinifera L. subsp. sativa (DC.) Hegi
C3	CHARDONNAY_BLANC		CHARDONNAY BLANC		2455	V. vinifera L. subsp. sativa (DC.) Hegi
C4	FRIULANO		FRIULANO		12543	V. vinifera L. subsp. sativa (DC.) Hegi
C5	FURMINT		FURMINT		4292	V. vinifera L. subsp. sativa (DC.) Hegi
C6	GEWUERZTRAMINER		GEWUERZTRAMINER		12609	V. vinifera L. subsp. sativa (DC.) Hegi
C7	GLERA		GLERA		9741	V. vinifera L. subsp. sativa (DC.) Hegi
C8	HEUNISCH_WEISS		HEUNISCH WEISS		5374	V. vinifera L. subsp. sativa (DC.) Hegi
C9	KOENIGSTRAUBE_WEISS		KRALJEVINA		24904	V. vinifera L. subsp. sativa (DC.) Hegi
C10	MERLOT_NOIR		MERLOT NOIR		7657	V. vinifera L. subsp. sativa (DC.) Hegi
C11	MUELLER_THURGAU_WEISS		MUELLER THURGAU WEISS		8141	V. vinifera L. subsp. sativa (DC.) Hegi
C12	MUSCAT_HAMBURG		MUSCAT HAMBURG		8226	V. vinifera L. subsp. sativa (DC.) Hegi
C13	PINOT_MEUNIER		PINOT MEUNIER		9278	V. vinifera L. subsp. sativa (DC.) Hegi
C14	PINOT_NOIR		PINOT NOIR		9279	V. vinifera L. subsp. sativa (DC.) Hegi
C15	PLAVEC_ZUTI		PLAVEC ZUTI		24539	V. vinifera L. subsp. sativa (DC.) Hegi
C16	PORTUGIESER_BLAU		PORTUGIESER BLAU		9620	V. vinifera L. subsp. sativa (DC.) Hegi
C17	RANFOL_BELI		RANFOL BELI		9908	V. vinifera L. subsp. sativa (DC.) Hegi
C18	SILVANER_GRUEN		SILVANER GRUEN		11805	V. vinifera L. subsp. sativa (DC.) Hegi
C19	WELSCHRIESLING		WELSCHRIESLING		13217	V. vinifera L. subsp. sativa (DC.) Hegi
C20	CHASSELAS_BLANC		CHASSELAS BLANC		2473	V. vinifera L. subsp. sativa (DC.) Hegi
C21	ZIMMETTRAUBE_BLAUSCHWARZ		ZIMMETTRAUBE BLAUSCHWARZ		17807	V. vinifera L. subsp. sativa (DC.) Hegi
C22	TANTOVINA_EICHENBLAETTRIGE		TANTOVINA EICHENBLAETTRIGE		23368	V. vinifera L. subsp. sativa (DC.) Hegi
C23	ZELENEC		ZELENEC		26014	V. vinifera L. subsp. sativa (DC.) Hegi
C24	KOELNER_BLAU		KOELNER BLAU		6344	V. vinifera L. subsp. sativa (DC.) Hegi
C25	PLAVAC_MALI_CRNI		PLAVAC MALI CRNI		9549	V. vinifera L. subsp. sativa (DC.) Hegi
C26	PIENEL		PIENEL		24568	V. vinifera L. subsp. sativa (DC.) Hegi
C27	RECIGLA		RECIGLA		17714	V. vinifera L. subsp. sativa (DC.) Hegi
C28	MOSCATO_DI_TERRACINA		MOSCATO DI TERRACINA		8053	V. vinifera L. subsp. sativa (DC.) Hegi
C29	POLJSAKICA		POLJSAKICA		17712	V. vinifera L. subsp. sativa (DC.) Hegi
C30	HARSLEVELUE		HARSLEVELUE		5314	V. vinifera L. subsp. sativa (DC.) Hegi
C31	TREBBIANO_TOSCANO		TREBBIANO TOSCANO		12628	V. vinifera L. subsp. sativa (DC.) Hegi
C32	DISECKA		DISECKA		42122	V. vinifera L. subsp. sativa (DC.) Hegi
C33	RIBOL		RIBOL		10053	V. vinifera L. subsp. sativa (DC.) Hegi
C34	FRIULANO		FRIULANO		12543	V. vinifera L. subsp. sativa (DC.) Hegi
C35	SCHIOPPETTINO		SCHIOPPETTINO		10830	V. vinifera L. subsp. sativa (DC.) Hegi
C36	VRTOVKA		VRTOVKA		17737	V. vinifera L. subsp. sativa (DC.) Hegi
C37	MALVASIA_ISTRIANA		MALVASIA ISTRIANA		7269	V. vinifera L. subsp. sativa (DC.) Hegi
H1	103_P2		-	abounded in nature	-	hybrids
H2	102_P1		-	abounded in nature	-	hybrids
H3	115_P14		-	abounded in nature	-	hybrids
H4	116_P15		-	abounded in nature	-	hybrids
H5	108_P7		-	abounded in nature	-	hybrids
H6	110_P9		-	abounded in nature	-	hybrids
H7	113_P12		-	abounded in nature	-	hybrids
H8	114_P13		-	abounded in nature	-	hybrids
H9	091_KO5		-	abounded in nature	-	hybrids
H10	095_KO9		-	abounded in nature	-	hybrids
PO1	106_P5		-	abounded in nature	-	rootstock
PO2	107_P6		-	abounded in nature	-	rootstock
PO3	109_P8		-	abounded in nature	-	rootstock
PO4	112_P11		-	abounded in nature	-	rootstock
PO5	117_P16		-	abounded in nature	-	rootstock
PO6	093_KO7		-	abounded in nature	-	rootstock
PO7	094_KO8		-	abounded in nature	-	rootstock
PO8	50_Vrbina1		-	abounded in nature	-	rootstock
PO9	SOLONIS		SOLONIS		11909	VITIS INTERSPECIFIC CROSSING
PO10	TELEKI_9B		TELEKI 9B		27111	VITIS INTERSPECIFIC CROSSING
PO11	TELEKI___8_B		TELEKI 8 B		12326	VITIS INTERSPECIFIC CROSSING
PO12	RIPARIA_GLOIRE_DE_MONTPELLIER		RIPARIA GLOIRE DE MONTPELLIER		4824	VITIS INTERSPECIFIC CROSSING
PO13	MILLARDET_ET_GRASSET__420_A		MILLARDET ET GRASSET 420 A		7810	VITIS INTERSPECIFIC CROSSING
